# Supplementary material for: Barcoding of Central European Cryptops centipedes reveals large interspecific distances with ghost lineages and new species records from Germany and Austria (Chilopoda, Scolopendromorpha)
Source: Zookeys. 2016 Feb 16;(564):21–46. doi: 10.3897/zookeys.564.7535 (PMC4820090; doi:10.3897/zookeys.564.7535)
Supplement: Supplementary material 2 — Uncorrected P-Distance [file zookeys-564-021-s002.xls]

## Sheet: MatrixOutput
Scolopendra_cingulata|GBOL02755|HR_Istra__Umag|
Theatops_erythrocephalus|GBOL02750|HR_Istra__Brestova|	0.19755
Cryptops sp. 2a|ZFMK-TIS-9755|AT_Burgenland__Rosaliakapelle|	0.23124	0.251142
Cryptops sp. 1|GBOL14857|SL_Zagon|	0.25268	0.25723	0.211568
Cryptops sp. 2b|GBOL14960|HR_Istra_Brestova|	0.234663	0.239329	0.158537	0.185976
Cryptops sp. 3|ZFMK-TIS-1434|DE_SN_Leipzig_Gondwana	0.223856	0.214286	0.194805	0.222403	0.203252
Cryptops_umbricus|BCZSMMYR00489|DE_BY_Weissenburg_Solnhofen|	0.24196	0.237443	0.191781	0.202435	0.207317	0.220779
Cryptops_anomalans|GBOL02745|DE_BW_Stuttgart_Zuffenhausen|	0.24196	0.2207	0.190259	0.197869	0.198171	0.201299	0.138508
Cryptops_anomalans|GBOL14852|DE_BW_S_Muehlhausen|	0.24196	0.2207	0.190259	0.197869	0.198171	0.201299	0.138508	0
Cryptops_anomalans|GBOL14950|DE_BW_S_Obertuerkheim|	0.24196	0.2207	0.190259	0.197869	0.198171	0.201299	0.138508	0	0
Cryptops_anomalans|ZFMK-TIS-15751|DE_NW_Bonn_Godesberg|	0.24196	0.2207	0.190259	0.197869	0.198171	0.201299	0.138508	0	0	0
Cryptops_anomalans|ZFMK-TIS-15752|DE_NW_Bonn_Godesberg|	0.24196	0.2207	0.190259	0.197869	0.198171	0.201299	0.138508	0	0	0	0
Cryptops_anomalans|ZFMK-TIS-1587|DE_SN_Leipzig_Pleiemuehlgraben|	0.24196	0.2207	0.190259	0.197869	0.198171	0.201299	0.138508	0	0	0	0	0
Cryptops_anomalans|ZFMK-TIS-18969|DE_NW_Bonn_Friesdorf|	0.24196	0.2207	0.190259	0.197869	0.198171	0.201299	0.138508	0	0	0	0	0	0
Cryptops_croaticus|ZFMK-TIS-9466|AT_Burgenland__Leithagebirge|	0.25268	0.219178	0.197869	0.175038	0.198171	0.202922	0.216134	0.210046	0.210046	0.210046	0.210046	0.210046	0.210046	0.210046
Cryptops_croaticus|ZFMK-TIS-2517180_AT_Burgenland_Leithagebirge_	0.25268	0.219178	0.197869	0.175038	0.198171	0.202922	0.216134	0.210046	0.210046	0.210046	0.210046	0.210046	0.210046	0.210046	0
Cryptops_hortensis|GBOL02747|D_BW_S_Steinhaldenfeld|	0.238921	0.249042	0.162835	0.187739	0.181992	0.220374	0.226054	0.208812	0.208812	0.208812	0.208812	0.208812	0.208812	0.208812	0.183908	0.183908
Cryptops_hortensis|GBOL10885|D_BW_S_Steinhaldenfeld|	0.236559	0.241221	0.163359	0.184733	0.174312	0.213008	0.219847	0.20458	0.20458	0.20458	0.20458	0.20458	0.20458	0.20458	0.183206	0.183206	0
Cryptops_hortensis|GBOL14853|D_BW_PF_Enzberg|	0.237654	0.240798	0.161043	0.184049	0.172043	0.211129	0.219325	0.203988	0.203988	0.203988	0.203988	0.203988	0.203988	0.203988	0.182515	0.182515	0	0
Cryptops_hortensis|GBOL14854|D_BW_FR_Badenweiler|	0.234219	0.249175	0.163366	0.176568	0.163636	0.211221	0.217822	0.206271	0.206271	0.206271	0.206271	0.206271	0.206271	0.206271	0.174917	0.174917	0.0254777	0.0214876	0.0183028
Cryptops_hortensis|GBOL14855|D_BW_EM_Kenzingen|	0.238897	0.243531	0.164384	0.187215	0.176829	0.212662	0.2207	0.207002	0.207002	0.207002	0.207002	0.207002	0.207002	0.207002	0.185693	0.185693	0	0	0	0.0231023
Cryptops_hortensis|GBOL14858|D_BW_WT_Albbruck|	0.23065	0.238829	0.161787	0.175655	0.165123	0.207237	0.215716	0.201849	0.201849	0.201849	0.201849	0.201849	0.201849	0.201849	0.171032	0.171032	0.0155039	0.0108192	0.00776398	0	0.0123267
Cryptops_hortensis|ZFMK-DNA-112780039|DE_BW_Konstanz_Mainau|	0.235835	0.240487	0.167428	0.188737	0.17378	0.217532	0.2207	0.207002	0.207002	0.207002	0.207002	0.207002	0.207002	0.207002	0.185693	0.185693	0.00957854	0.00763359	0.00460123	0.0165017	0.00913242	0.00616333
Cryptops_hortensis|ZFMK-DNA-112780041|IT_Lombardia_Sondrio_Chiavenna|	0.234663	0.23628	0.164634	0.184451	0.163359	0.211382	0.224085	0.207317	0.207317	0.207317	0.207317	0.207317	0.207317	0.207317	0.178354	0.178354	0.0191939	0.0137615	0.0107527	0.0181818	0.0167683	0.0108025	0.0106707
Cryptops_hortensis|ZFMK-TIS-1289|DE_SN_Bautzen_ZeiholzerMoor|	0.240798	0.242378	0.167683	0.185976	0.172519	0.214634	0.219512	0.207317	0.207317	0.207317	0.207317	0.207317	0.207317	0.207317	0.1875	0.1875	0.0115163	0.00764526	0.0030722	0.0181818	0.00914634	0.00771605	0.00457317	0.0122137
Cryptops_hortensis|ZFMK-TIS-1470|DE_BR__Babelsberg|	0.234663	0.240854	0.167683	0.1875	0.166412	0.214634	0.22561	0.208841	0.208841	0.208841	0.208841	0.208841	0.208841	0.208841	0.182927	0.182927	0.0230326	0.0168196	0.0122888	0.0247934	0.0198171	0.0169753	0.0137195	0.00458015	0.0122137
Cryptops_hortensis|ZFMK-TIS-1528|DE_ST__Friedeburg|	0.236559	0.238168	0.170992	0.183206	0.171254	0.214984	0.224427	0.210687	0.210687	0.210687	0.210687	0.210687	0.210687	0.210687	0.180153	0.180153	0.0230769	0.0183767	0.0153846	0.031457	0.021374	0.0231839	0.0198473	0.0107034	0.0183486	0.00458716
Cryptops_hortensis|ZFMK-TIS-1543|DE_ST_Harz_Ilsenburg|	0.236559	0.239695	0.164885	0.18626	0.172783	0.214984	0.218321	0.20458	0.20458	0.20458	0.20458	0.20458	0.20458	0.20458	0.183206	0.183206	0.00576923	0.00306279	0.0015361	0.0149007	0.00458015	0.00463679	0.00152672	0.00917431	0.0030581	0.0122324	0.0168196
Cryptops_hortensis|ZFMK-TIS-15555|DE_RP_Niederzissen_Bausenberg|622Bp	0.244337	0.250804	0.173633	0.196141	0.181672	0.222031	0.228296	0.210611	0.210611	0.210611	0.210611	0.210611	0.210611	0.210611	0.191318	0.191318	0.00957854	0.00645161	0.00162075	0.0210158	0.00803859	0.0114007	0.00803859	0.0161031	0.00483092	0.0161031	0.0209677	0.00483871
Cryptops_hortensis|ZFMK-TIS-15761|DE_NW_Bonn_Godesberg|	0.236196	0.245427	0.169207	0.182927	0.169466	0.211382	0.224085	0.207317	0.207317	0.207317	0.207317	0.207317	0.207317	0.207317	0.179878	0.179878	0.0230326	0.0168196	0.0138249	0.00495868	0.0182927	0.00154083	0.0121951	0.0167939	0.0137405	0.0229008	0.029052	0.0107034	0.0177134
Cryptops_hortensis|ZFMK-TIS-2507217|DE_BR__Babelsberg|	0.236559	0.238168	0.169466	0.181679	0.166667	0.211726	0.222901	0.207634	0.207634	0.207634	0.207634	0.207634	0.207634	0.207634	0.181679	0.181679	0.0288462	0.0214395	0.0184332	0.0331126	0.0244275	0.0231839	0.0198473	0.0137615	0.0152905	0.00764526	0.00612557	0.0183486	0.0225806	0.029052
Cryptops_hortensis|ZFMK-TIS-2519823|DE_ST__Friedeburg|	0.240429	0.243531	0.167428	0.188737	0.175305	0.214286	0.222222	0.203957	0.203957	0.203957	0.203957	0.203957	0.203957	0.203957	0.185693	0.185693	0.00383142	0.00152672	0.00153374	0.0214521	0.00304414	0.0123267	0.00913242	0.0137195	0.00914634	0.0167683	0.0183206	0.00458015	0.00803859	0.0182927	0.021374
Cryptops_hortensis|ZFMK-TIS-2531556|DE_MV_Mueritz_Waren|	0.240798	0.243902	0.166159	0.1875	0.177099	0.21626	0.221037	0.205793	0.205793	0.205793	0.205793	0.205793	0.205793	0.205793	0.1875	0.1875	0.00383877	0.00152905	0	0.0198347	0.00304878	0.00925926	0.00609756	0.0137405	0.00458015	0.0152672	0.0168196	0.00152905	0.00322061	0.0152672	0.0198777	0.00304878
Cryptops_hortensis|ZFMK-TIS-2531557|DE_MV_Mueritz_Waren|	0.238897	0.243531	0.164384	0.187215	0.176829	0.212662	0.2207	0.207002	0.207002	0.207002	0.207002	0.207002	0.207002	0.207002	0.185693	0.185693	0	0	0	0.0231023	0	0.0123267	0.00913242	0.0167683	0.00914634	0.0198171	0.021374	0.00458015	0.00803859	0.0182927	0.0244275	0.00304414	0.00304878
Cryptops_parisi|ZFMK-DNA-112780049|DE_BY_Dachau_Glonnbercha|	0.248086	0.219178	0.196347	0.191781	0.195122	0.198052	0.197869	0.200913	0.200913	0.200913	0.200913	0.200913	0.200913	0.200913	0.143075	0.143075	0.197318	0.189313	0.18865	0.186469	0.190259	0.183359	0.193303	0.190549	0.193598	0.195122	0.2	0.192366	0.197749	0.185976	0.196947	0.191781	0.193598	0.190259
Cryptops_parisi|GBOL12332|GB_WLS__Aberbargoed|	0.249617	0.217656	0.196347	0.193303	0.198171	0.199675	0.199391	0.202435	0.202435	0.202435	0.202435	0.202435	0.202435	0.202435	0.144597	0.144597	0.199234	0.19084	0.190184	0.188119	0.191781	0.1849	0.194825	0.192073	0.195122	0.196646	0.201527	0.193893	0.199357	0.1875	0.198473	0.193303	0.195122	0.191781	0.00304414
Cryptops_parisi|ZFMK-TIS-15462|DE_NW_Bonn_Oberkassel|	0.246554	0.2207	0.194825	0.194825	0.196646	0.196429	0.196347	0.203957	0.203957	0.203957	0.203957	0.203957	0.203957	0.203957	0.144597	0.144597	0.193487	0.18626	0.185583	0.188119	0.187215	0.181818	0.190259	0.1875	0.190549	0.192073	0.196947	0.189313	0.194534	0.185976	0.193893	0.188737	0.190549	0.187215	0.00913242	0.0121766
Cryptops_parisi|ZFMK-TIS-15753|DE_RP_Niederzissen_Bausenberg|	0.248086	0.216134	0.194825	0.194825	0.196646	0.198052	0.197869	0.200913	0.200913	0.200913	0.200913	0.200913	0.200913	0.200913	0.143075	0.143075	0.199234	0.189313	0.18865	0.186469	0.190259	0.183359	0.193303	0.190549	0.193598	0.195122	0.2	0.192366	0.197749	0.185976	0.196947	0.191781	0.193598	0.190259	0.00456621	0.00152207	0.0136986
Cryptops_parisi|ZFMK-TIS-15767|DE_NW_Wuppertal_NSGHoelken|	0.249617	0.217656	0.196347	0.193303	0.198171	0.199675	0.199391	0.202435	0.202435	0.202435	0.202435	0.202435	0.202435	0.202435	0.144597	0.144597	0.199234	0.19084	0.190184	0.188119	0.191781	0.1849	0.194825	0.192073	0.195122	0.196646	0.201527	0.193893	0.199357	0.1875	0.198473	0.193303	0.195122	0.191781	0.00304414	0	0.0121766	0.00152207
Cryptops_parisi|ZFMK-TIS-15786|DE_NW_Enneepe-Ruhr_Erlenhoehle|	0.245399	0.219512	0.195122	0.192073	0.192366	0.198374	0.195122	0.199695	0.199695	0.199695	0.199695	0.199695	0.199695	0.199695	0.143293	0.143293	0.195777	0.189602	0.18894	0.186777	0.190549	0.183642	0.193598	0.19084	0.193893	0.19542	0.200306	0.192661	0.198068	0.18626	0.197248	0.192073	0.193893	0.190549	0.00152439	0.00457317	0.00609756	0.00609756	0.00457317
Cryptops_parisi|ZFMK-TIS-19435|DE_RP_Altenkirchen_Seelbach|	0.246933	0.219512	0.193598	0.193598	0.196947	0.196748	0.196646	0.204268	0.204268	0.204268	0.204268	0.204268	0.204268	0.204268	0.144817	0.144817	0.191939	0.185015	0.184332	0.186777	0.185976	0.180556	0.189024	0.18626	0.189313	0.19084	0.195719	0.188073	0.193237	0.184733	0.192661	0.1875	0.189313	0.185976	0.00914634	0.0121951	0	0.0137195	0.0121951	0.00610687
Cryptops_parisi|ZFMK-TIS-19436|DE_RP_Altenkirchen_Seelbach|	0.246554	0.2207	0.194825	0.194825	0.196646	0.196429	0.196347	0.203957	0.203957	0.203957	0.203957	0.203957	0.203957	0.203957	0.144597	0.144597	0.193487	0.18626	0.185583	0.188119	0.187215	0.181818	0.190259	0.1875	0.190549	0.192073	0.196947	0.189313	0.194534	0.185976	0.193893	0.188737	0.190549	0.187215	0.00913242	0.0121766	0	0.0136986	0.0121766	0.00609756	0
Cryptops_parisi|ZFMK-TIS-19439|DE_NW_Bochum_BotGarten|	0.246554	0.2207	0.194825	0.194825	0.196646	0.196429	0.196347	0.203957	0.203957	0.203957	0.203957	0.203957	0.203957	0.203957	0.144597	0.144597	0.193487	0.18626	0.185583	0.188119	0.187215	0.181818	0.190259	0.1875	0.190549	0.192073	0.196947	0.189313	0.194534	0.185976	0.193893	0.188737	0.190549	0.187215	0.00913242	0.0121766	0	0.0136986	0.0121766	0.00609756	0	0
Cryptops_parisi|ZFMK-TIS-19592|DE_NW_Bonn_Wachtberg|	0.246554	0.2207	0.194825	0.194825	0.196646	0.196429	0.196347	0.203957	0.203957	0.203957	0.203957	0.203957	0.203957	0.203957	0.144597	0.144597	0.193487	0.18626	0.185583	0.188119	0.187215	0.181818	0.190259	0.1875	0.190549	0.192073	0.196947	0.189313	0.194534	0.185976	0.193893	0.188737	0.190549	0.187215	0.00913242	0.0121766	0	0.0136986	0.0121766	0.00609756	0	0	0
Cryptops_parisi|ZFMK-TIS-19593|DE_NW_Bonn_Roettgen|	0.246554	0.2207	0.191781	0.194825	0.199695	0.196429	0.196347	0.207002	0.207002	0.207002	0.207002	0.207002	0.207002	0.207002	0.147641	0.147641	0.193487	0.18626	0.185583	0.188119	0.187215	0.181818	0.190259	0.1875	0.190549	0.192073	0.196947	0.189313	0.194534	0.185976	0.193893	0.188737	0.190549	0.187215	0.0121766	0.0152207	0.00304414	0.0167428	0.0152207	0.00914634	0.00152439	0.00304414	0.00304414	0.00304414
Cryptops_parisi|ZFMK-TIS-2517115|DE_NW_Rhein-Sieg_Stromberg|	0.245023	0.2207	0.193303	0.193303	0.195122	0.198052	0.197869	0.202435	0.202435	0.202435	0.202435	0.202435	0.202435	0.202435	0.147641	0.147641	0.199234	0.19084	0.190184	0.188119	0.191781	0.1849	0.194825	0.192073	0.195122	0.196646	0.201527	0.193893	0.199357	0.1875	0.198473	0.193303	0.195122	0.191781	0.00608828	0.00608828	0.00608828	0.00761035	0.00608828	0.00304878	0.00609756	0.00608828	0.00608828	0.00608828	0.00913242
Cryptops_parisi|ZFMK-TIS-2520349|DE_BW_Ludwigsburg_Salonwald|	0.246554	0.2207	0.194825	0.194825	0.196646	0.196429	0.196347	0.203957	0.203957	0.203957	0.203957	0.203957	0.203957	0.203957	0.144597	0.144597	0.193487	0.18626	0.185583	0.188119	0.187215	0.181818	0.190259	0.1875	0.190549	0.192073	0.196947	0.189313	0.194534	0.185976	0.193893	0.188737	0.190549	0.187215	0.00913242	0.0121766	0	0.0136986	0.0121766	0.00609756	0	0	0	0	0.00304414	0.00608828
Cryptops_parisi_sebini|ZFMK-TIS-2517130|IT_Lombardia_Brescia_Pisogne|	0.238897	0.214612	0.185693	0.191781	0.192073	0.194805	0.199391	0.196347	0.196347	0.196347	0.196347	0.196347	0.196347	0.196347	0.144597	0.144597	0.204981	0.203053	0.202454	0.19802	0.205479	0.197227	0.208524	0.202744	0.208841	0.207317	0.210687	0.206107	0.209003	0.20122	0.20916	0.207002	0.207317	0.205479	0.0898021	0.0882801	0.0898021	0.086758	0.0882801	0.0884146	0.089939	0.0898021	0.0898021	0.0898021	0.0898021	0.086758	0.0898021
Cryptops_parisi_sebini|ZFMK-TIS-1619|DE_SN_Leipzig_Schoenefeld|	0.238095	0.216794	0.18626	0.193893	0.192661	0.192182	0.196947	0.196947	0.196947	0.196947	0.196947	0.196947	0.196947	0.196947	0.143511	0.143511	0.205769	0.203675	0.203077	0.198675	0.206107	0.197836	0.20916	0.203364	0.20948	0.207951	0.211332	0.206738	0.209677	0.201835	0.209801	0.207634	0.207951	0.206107	0.0854962	0.0839695	0.0854962	0.0824427	0.0839695	0.0840979	0.0856269	0.0854962	0.0854962	0.0854962	0.0854962	0.0824427	0.0854962	0.00305344
Cryptops_parisi_sebini|BCZSMMYR00490|DE_BW_Esslingen_StBernhard|	0.240429	0.216134	0.185693	0.190259	0.192073	0.196429	0.199391	0.197869	0.197869	0.197869	0.197869	0.197869	0.197869	0.197869	0.14003	0.14003	0.204981	0.20458	0.203988	0.19967	0.207002	0.198767	0.210046	0.204268	0.210366	0.208841	0.212214	0.207634	0.210611	0.202744	0.210687	0.208524	0.208841	0.207002	0.0913242	0.0898021	0.0943683	0.0882801	0.0898021	0.089939	0.0945122	0.0943683	0.0943683	0.0943683	0.0943683	0.0913242	0.0943683	0.00456621	0.00610687
Cryptops_parisi_sebini|GBOL02712|DE_BY_Muenchen_Schwarzhoelzl|	0.240429	0.216134	0.185693	0.190259	0.192073	0.196429	0.199391	0.197869	0.197869	0.197869	0.197869	0.197869	0.197869	0.197869	0.14003	0.14003	0.204981	0.20458	0.203988	0.19967	0.207002	0.198767	0.210046	0.204268	0.210366	0.208841	0.212214	0.207634	0.210611	0.202744	0.210687	0.208524	0.208841	0.207002	0.0913242	0.0898021	0.0943683	0.0882801	0.0898021	0.089939	0.0945122	0.0943683	0.0943683	0.0943683	0.0943683	0.0913242	0.0943683	0.00456621	0.00610687
Cryptops_parisi_sebini|GBOL02742|DE_BY_Garmisch_Grafenaschau|	0.240429	0.216134	0.185693	0.190259	0.192073	0.196429	0.199391	0.197869	0.197869	0.197869	0.197869	0.197869	0.197869	0.197869	0.14003	0.14003	0.204981	0.20458	0.203988	0.19967	0.207002	0.198767	0.210046	0.204268	0.210366	0.208841	0.212214	0.207634	0.210611	0.202744	0.210687	0.208524	0.208841	0.207002	0.0913242	0.0898021	0.0943683	0.0882801	0.0898021	0.089939	0.0945122	0.0943683	0.0943683	0.0943683	0.0943683	0.0913242	0.0943683	0.00456621	0.00610687
Cryptops_parisi_sebini|GBOL11266|DE_BW_Esslingen_Esslingen|	0.240429	0.216134	0.185693	0.190259	0.192073	0.196429	0.199391	0.197869	0.197869	0.197869	0.197869	0.197869	0.197869	0.197869	0.14003	0.14003	0.204981	0.20458	0.203988	0.19967	0.207002	0.198767	0.210046	0.204268	0.210366	0.208841	0.212214	0.207634	0.210611	0.202744	0.210687	0.208524	0.208841	0.207002	0.0913242	0.0898021	0.0943683	0.0882801	0.0898021	0.089939	0.0945122	0.0943683	0.0943683	0.0943683	0.0943683	0.0913242	0.0943683	0.00456621	0.00610687
Cryptops_parisi_sebini|GBOL14856|D_BW_ES_Esslingen|	0.240429	0.216134	0.185693	0.190259	0.192073	0.196429	0.199391	0.197869	0.197869	0.197869	0.197869	0.197869	0.197869	0.197869	0.14003	0.14003	0.204981	0.20458	0.203988	0.19967	0.207002	0.198767	0.210046	0.204268	0.210366	0.208841	0.212214	0.207634	0.210611	0.202744	0.210687	0.208524	0.208841	0.207002	0.0913242	0.0898021	0.0943683	0.0882801	0.0898021	0.089939	0.0945122	0.0943683	0.0943683	0.0943683	0.0943683	0.0913242	0.0943683	0.00456621	0.00610687
Cryptops_parisi_sebini|GBOL14859|D_BY_RT_StJohann|	0.240429	0.216134	0.185693	0.190259	0.192073	0.196429	0.199391	0.197869	0.197869	0.197869	0.197869	0.197869	0.197869	0.197869	0.14003	0.14003	0.204981	0.20458	0.203988	0.19967	0.207002	0.198767	0.210046	0.204268	0.210366	0.208841	0.212214	0.207634	0.210611	0.202744	0.210687	0.208524	0.208841	0.207002	0.0913242	0.0898021	0.0943683	0.0882801	0.0898021	0.089939	0.0945122	0.0943683	0.0943683	0.0943683	0.0943683	0.0913242	0.0943683	0.00456621	0.00610687
Cryptops_parisi_sebini|GBOL14863|D_BY_EI_Pfuenz|	0.240429	0.216134	0.185693	0.190259	0.192073	0.196429	0.199391	0.197869	0.197869	0.197869	0.197869	0.197869	0.197869	0.197869	0.14003	0.14003	0.204981	0.20458	0.203988	0.19967	0.207002	0.198767	0.210046	0.204268	0.210366	0.208841	0.212214	0.207634	0.210611	0.202744	0.210687	0.208524	0.208841	0.207002	0.0913242	0.0898021	0.0943683	0.0882801	0.0898021	0.089939	0.0945122	0.0943683	0.0943683	0.0943683	0.0943683	0.0913242	0.0943683	0.00456621	0.00610687
Cryptops_parisi_sebini|ZFMK-DNA-112780073|DE_BY_Toelz_Altjoch|	0.240429	0.216134	0.185693	0.190259	0.192073	0.196429	0.199391	0.197869	0.197869	0.197869	0.197869	0.197869	0.197869	0.197869	0.14003	0.14003	0.204981	0.20458	0.203988	0.19967	0.207002	0.198767	0.210046	0.204268	0.210366	0.208841	0.212214	0.207634	0.210611	0.202744	0.210687	0.208524	0.208841	0.207002	0.0913242	0.0898021	0.0943683	0.0882801	0.0898021	0.089939	0.0945122	0.0943683	0.0943683	0.0943683	0.0943683	0.0913242	0.0943683	0.00456621	0.00610687
Cryptops_parisi_sebini|ZFMK-TIS-1561|DE_BY_Hof_NSGHoellental|	0.240429	0.216134	0.185693	0.190259	0.192073	0.196429	0.199391	0.197869	0.197869	0.197869	0.197869	0.197869	0.197869	0.197869	0.14003	0.14003	0.204981	0.20458	0.203988	0.19967	0.207002	0.198767	0.210046	0.204268	0.210366	0.208841	0.212214	0.207634	0.210611	0.202744	0.210687	0.208524	0.208841	0.207002	0.0913242	0.0898021	0.0943683	0.0882801	0.0898021	0.089939	0.0945122	0.0943683	0.0943683	0.0943683	0.0943683	0.0913242	0.0943683	0.00456621	0.00610687
Cryptops_parisi_sebini|ZFMK-TIS-6357|DE_SN_Meissen_Groeditz|	0.240429	0.216134	0.185693	0.190259	0.192073	0.196429	0.199391	0.197869	0.197869	0.197869	0.197869	0.197869	0.197869	0.197869	0.14003	0.14003	0.204981	0.20458	0.203988	0.19967	0.207002	0.198767	0.210046	0.204268	0.210366	0.208841	0.212214	0.207634	0.210611	0.202744	0.210687	0.208524	0.208841	0.207002	0.0913242	0.0898021	0.0943683	0.0882801	0.0898021	0.089939	0.0945122	0.0943683	0.0943683	0.0943683	0.0943683	0.0913242	0.0943683	0.00456621	0.00610687
Cryptops_cf_hortensis|GBOL14843|D_BY_FRG_Felswandergebiet|	0.246554	0.199391	0.191781	0.194825	0.204268	0.193182	0.196347	0.187215	0.187215	0.187215	0.187215	0.187215	0.187215	0.187215	0.136986	0.136986	0.191571	0.196947	0.194785	0.19802	0.197869	0.192604	0.199391	0.195122	0.199695	0.199695	0.203053	0.196947	0.20418	0.196646	0.201527	0.200913	0.198171	0.197869	0.111111	0.109589	0.111111	0.108067	0.109589	0.109756	0.109756	0.111111	0.111111	0.111111	0.111111	0.111111	0.111111	0.103501	0.0977099
Cryptops_cf_hortensis|GBOL14862|D_BY_FRG_Lusen|	0.246554	0.199391	0.191781	0.194825	0.204268	0.193182	0.196347	0.187215	0.187215	0.187215	0.187215	0.187215	0.187215	0.187215	0.136986	0.136986	0.191571	0.196947	0.194785	0.19802	0.197869	0.192604	0.199391	0.195122	0.199695	0.199695	0.203053	0.196947	0.20418	0.196646	0.201527	0.200913	0.198171	0.197869	0.111111	0.109589	0.111111	0.108067	0.109589	0.109756	0.109756	0.111111	0.111111	0.111111	0.111111	0.111111	0.111111	0.103501	0.0977099
Cryptops_cf_hortensis|BCZSMMYR00493|AT_Salzburg__Strobl|624Bp	0.246753	0.198387	0.18871	0.195161	0.204839	0.193437	0.195161	0.182258	0.182258	0.182258	0.182258	0.182258	0.182258	0.182258	0.132258	0.132258	0.190751	0.199029	0.196748	0.200351	0.2	0.194444	0.201613	0.197092	0.201939	0.201939	0.205502	0.199029	0.203883	0.198708	0.203883	0.203226	0.200323	0.2	0.106452	0.104839	0.106452	0.103226	0.104839	0.105008	0.105008	0.106452	0.106452	0.106452	0.106452	0.106452	0.106452	0.101613	0.0970874
Cryptops_cf_hortensis|GBOL14861|D_BY_BGL_Lercheck|	0.251216	0.199678	0.191626	0.199678	0.20934	0.198276	0.196457	0.183575	0.183575	0.183575	0.183575	0.183575	0.183575	0.183575	0.133655	0.133655	0.194231	0.203554	0.201299	0.205263	0.204509	0.199021	0.206119	0.201613	0.206452	0.206452	0.210016	0.203554	0.20712	0.203226	0.208401	0.207729	0.204839	0.204509	0.10789	0.10628	0.10789	0.10467	0.10628	0.106452	0.106452	0.10789	0.10789	0.10789	0.10789	0.10789	0.10789	0.10467	0.100162
Cryptops_cf_hortensis|GBOL14860|AT_Oberoesterreich_Ischl|	0.248086	0.200913	0.193303	0.196347	0.210366	0.198052	0.194825	0.185693	0.185693	0.185693	0.185693	0.185693	0.185693	0.185693	0.135464	0.135464	0.193487	0.20458	0.202454	0.206271	0.205479	0.200308	0.207002	0.202744	0.207317	0.207317	0.210687	0.20458	0.209003	0.204268	0.20916	0.208524	0.205793	0.205479	0.112633	0.111111	0.112633	0.109589	0.111111	0.11128	0.11128	0.112633	0.112633	0.112633	0.112633	0.112633	0.112633	0.105023	0.10229
Cryptops_cf_hortensis|GBOL11259|DE_BY_Deggendorf_Unterfrohnstetten|	0.246554	0.199391	0.191781	0.194825	0.204268	0.193182	0.196347	0.187215	0.187215	0.187215	0.187215	0.187215	0.187215	0.187215	0.136986	0.136986	0.191571	0.196947	0.194785	0.19802	0.197869	0.192604	0.199391	0.195122	0.199695	0.199695	0.203053	0.196947	0.20418	0.196646	0.201527	0.200913	0.198171	0.197869	0.111111	0.109589	0.111111	0.108067	0.109589	0.109756	0.109756	0.111111	0.111111	0.111111	0.111111	0.111111	0.111111	0.103501	0.0977099
Cryptops_cf_hortensis|ZFMK-TIS-9712|AT_Niederoesterreich__Schneeberg|	0.246933	0.199695	0.192073	0.195122	0.207634	0.193496	0.193598	0.184451	0.184451	0.184451	0.184451	0.184451	0.184451	0.184451	0.134146	0.134146	0.191939	0.201527	0.199387	0.203306	0.20122	0.197531	0.204268	0.2	0.20458	0.20458	0.207951	0.201835	0.20934	0.201527	0.206422	0.204268	0.203053	0.20122	0.11128	0.109756	0.11128	0.108232	0.109756	0.109924	0.109924	0.11128	0.11128	0.11128	0.11128	0.11128	0.11128	0.103659	0.100917
[truncated: 16 more columns]

## Sheet: Caption
Table. Estimates of Evolutionary Divergence between Sequences
The number of base differences per site from between sequences are shown. The analysis involved 66 nucleotide sequences. Codon positions included were 1st+2nd+3rd+Noncoding. All ambiguous positions were removed for each sequence pair. There were a total of 657 positions in the final dataset. Evolutionary analyses were conducted in MEGA6 [1].
1. Tamura K., Stecher G., Peterson D., Filipski A., and Kumar S. (2013). MEGA6: Molecular Evolutionary Genetics Analysis version 6.0. Molecular Biology and Evolution30: 2725-2729.
Disclaimer: Although utmost care has been taken to ensure the correctness of the caption, the caption text is provided "as is" without any warranty of any kind. Authors advise the user to carefully check the caption prior to its use for any purpose and report any errors or problems to the authors immediately (www.megasoftware.net). In no event shall the authors and their employers be liable for a…
